# Supplementary material for: Inducing magnetic communication in caged dinuclear Co(ii) systems
Source: Royal Society of Chemistry journal article supplement (doi:10.1039/c5dt00497g), 2015-01-01
Supplement: c5dt00497g1.pdf [file c5dt00497g1.pdf]

## Supporting Information

# Inducing Magnetic Communication in Caged Dinuclear Co(II) Systems

Judith Caballero-Jiménez,<sup>a</sup> Fatemah Habib,<sup>b</sup> Daniel Ramírez-Rosales,<sup>c</sup> Rafael Grande-Aztatzi,<sup>d</sup>  
Gabriel Merino,<sup>d</sup> Ilia Korobkov,<sup>b</sup> Mukesh Kumar Singh,<sup>e</sup> Gopalan Rajaraman,<sup>e</sup> Yasmi Reyes-  
Ortega<sup>a</sup> and Muralee Murugesu<sup>b\*</sup>.

---

**Table S1.** Crystallographic Data for **L1** and complex **6**.

---

a

**Table S2.** Selected Bond Distances (Å) and Angles for complexes 1-5.

| Formula                             |                                                   | Bond Distances (Å)      |                                                 |            |                |
|-------------------------------------|---------------------------------------------------|-------------------------|-------------------------------------------------|------------|----------------|
|                                     |                                                   | $C_{37}H_{67}N_{15}O_3$ | $C_{44.5}H_{60}Cl_{10.5}Co_3N_{13.5}O_5S_{4.5}$ |            |                |
| FW, g.mol <sup>-1</sup>             |                                                   | 1                       | 3                                               | 5          |                |
| Crystal system                      |                                                   | Triclinic               |                                                 | Monoclinic |                |
| Centro de<br>Instituto<br>Ciencias, | Space group                                       | P-1                     |                                                 | Pn         | Química,<br>de |
|                                     | <i>a</i> , Å                                      | 10.7107(2)              |                                                 | 11.2372(6) |                |
|                                     | <i>b</i> , Å                                      | 14.7465(3)              |                                                 | 14.5050(8) |                |
|                                     | <i>c</i> , Å                                      | 15.1857(3)              |                                                 | 16.5974(9) |                |
|                                     | <i>α</i> , °                                      | 108.500(1)              |                                                 | 90         |                |
|                                     | <i>β</i> , °                                      | 93.433(1)               |                                                 | 92.909(3)  |                |
|                                     | <i>γ</i> , °                                      | 94.351(1)               |                                                 | 90         |                |
|                                     | V, Å <sup>3</sup>                                 | 2259.05(8)              |                                                 | 2701.8(3)  |                |
|                                     | Z                                                 | 2                       |                                                 | 1          |                |
|                                     | $\rho_{\text{calcd}}$ , g.cm <sup>-3</sup>        | 1.248                   |                                                 | 1.479      |                |
|                                     | $\mu$ (Mo, K $\alpha$ ), mm <sup>-1</sup>         | 0.364                   |                                                 | 1.165      |                |
|                                     | <i>F</i> (000)                                    | 908.0                   |                                                 | 1246       |                |
|                                     | measd/indep                                       | 32786 / 11133           |                                                 | 30852/6606 |                |
|                                     | <i>R</i> 1 ( <i>I</i> > 2 $\sigma$ ( <i>I</i> ))  | 0.0654                  |                                                 | 0.0562     |                |
|                                     | <i>wR</i> 2 ( <i>I</i> > 2 $\sigma$ ( <i>I</i> )) | 0.2065                  |                                                 | 0.1163     |                |
|                                     | GOF on <i>F</i> <sup>2</sup>                      | 1.046                   |                                                 | 1.051      |                |

$$R1 = \frac{\sum ||Fo| - |Fc||}{\sum |Fo|}; wR2 = \left\{ \frac{\sum w[(Fo)^2 - (Fc)^2]^2}{\sum w[(Fo)^2]^2} \right\}^{1/2}$$

Universidad Autónoma de Puebla, A.P. 1613, 72000 Puebla, Pue., México.

<sup>b</sup> Department of Chemistry, University of Ottawa, 10 Marie Curie, Ottawa, Canada K1N6N5.

<sup>c</sup> Departamento de Física, Escuela Superior de Física y Matemáticas, I.P.N., , Av. Instituto Politécnico Nacional s/n San Pedro Zacatenco, D. F., México, 07738.

<sup>d</sup> Departamento de Física Aplicada, Centro de Investigación de Estudios Avanzados Unidad Mérida. km 6 Antigua carretera a Progreso. Apdo. Postal 73, Cordemex, 97310, Mérida, Yuc., México.

<sup>e</sup> Department of Chemistry, Indian Institute of Technology Bombay, Mumbai, Powai- 400076, India.

|             |          |          |          |          |           |
|-------------|----------|----------|----------|----------|-----------|
| Co(1)-O(1)  | 1.946(4) | 1.985(4) |          |          |           |
| Co(1)-N(1)  | 2.201(5) | 2.106(4) | 2.216(8) | 2.236(3) | 2.209(4)  |
| Co(1)-N(2)  | 2.125(5) | 2.123(5) | 2.108(7) | 2.116(4) | 2.113(5)  |
| Co(1)-N(3)  | 2.113(5) | 2.111(5) | 2.123(7) | 2.111(4) | 2.113(5)  |
| Co(1)-N(4)  | 2.151(5) | 2.215(4) | 2.106(8) | 2.109(4) | 2.128(5)  |
| Co(1)-N(5)  |          |          | 1.989(7) |          |           |
| Co(1)-Cl(1) |          |          |          | 2.364(5) |           |
| Co(1)-Br(1) |          |          |          |          | 2.4432(6) |
| Co(2)-O(2)  | 1.950(5) |          |          |          |           |
| Co(2)-N(5)  | 2.198(5) | 2.224(4) |          |          |           |
| Co(2)-N(6)  | 2.127(5) | 2.113(5) |          |          |           |
| Co(2)-N(7)  | 2.118(5) | 2.116(5) |          |          |           |
| Co(2)-N(8)  | 2.201(8) | 2.089(5) |          |          |           |
| Co(2)-N(9)  |          | 1.998(4) |          |          |           |

### Angles (°)

|                 | 1          | 2          | 3        | 4          | 5          |
|-----------------|------------|------------|----------|------------|------------|
| O(1)-Co(1)-N(1) | 177.75(17) | 177.05(17) |          |            |            |
| O(1)-Co(1)-N(2) | 99.09(16)  | 101.18(17) |          |            |            |
| O(1)-Co(1)-N(3) |            | 99.95(18)  |          |            |            |
| O(1)-Co(1)-N(4) | 95.9(2)    | 96.07(17)  |          |            |            |
| N(4)-Co(1)-N(1) | 82.0(2)    | 81.21(17)  | 79.8(3)  | 80.65(17)  | 82.32(17)  |
| N(3)-Co(1)-N(1) | 81.4(2)    | 80.58(17)  | 81.1(3)  | 80.86(15)  | 81.70(18)  |
| N(2)-Co(1)-N(1) | 81.5(2)    | 81.19(16)  | 80.5(3)  | 80.69(19)  | 81.7(2)    |
| N(3)-Co(1)-N(2) | 108.60(18) | 113.53(18) | 112.3(3) | 116.21(15) | 118.10(18) |
| N(2)-Co(1)-N(4) | 128.1(2)   | 118.7(2)   | 125.8(3) | 117.48(16) | 116.56(18) |
| N(3)-Co(1)-N(4) | 117.0(2)   | 120.6(2)   | 113.7(3) | 118.69(16) | 119.48(19) |
| N(5)-Co(1)-N(3) |            |            | 102.2(3) |            |            |
| N(5)-Co(1)-N(4) |            |            | 97.7(3)  |            |            |
| N(5)-Co(1)-N(2) |            |            | 99.2(3)  |            |            |
| N(5)-Co(1)-N(1) |            |            | 176.5(3) |            |            |
| O(2)-Co(2)-N(5) | 177.37(18) |            |          |            |            |
| O(2)-Co(2)-N(6) | 98.54(17)  |            |          |            |            |
| O(2)-Co(2)-N(7) | 101.1(2)   |            |          |            |            |
| O(2)-Co(2)-N(8) | 100.2(3)   |            |          |            |            |
| N(6)-Co(2)-N(5) | 81.83(18)  | 80.95(17)  |          |            |            |
| N(7)-Co(2)-N(5) | 81.2(2)    | 80.60(17)  |          |            |            |
| N(6)-Co(2)-N(8) | 138.4(3)   | 118.3(2)   |          |            |            |
| N(9)-Co(2)-N(8) |            | 96.13(18)  |          |            |            |
| N(9)-Co(2)-N(7) |            | 101.05(18) |          |            |            |
| N(8)-Co(2)-N(7) |            | 120.2(2)   |          |            |            |
| N(9)-Co(2)-N(6) |            | 99.91(17)  |          |            |            |
| N(8)-Co(2)-N(6) |            | 118.3(2)   |          |            |            |
| N(7)-Co(2)-N(6) |            | 114.3(2)   |          |            |            |
| N(9)-Co(2)-N(5) |            | 177.55(18) |          |            |            |

|                        |           |            |            |
|------------------------|-----------|------------|------------|
| N(8)-Co(2)-N(5)        | 81.45(18) |            |            |
| N(4)-Co(1)-Cl(1)/Br(1) |           | 99.04(12)  | 98.66(12)  |
| N(3)-Co(1)-Cl(1)/Br(1) |           | 100.01(12) | 97.62(12)  |
| N(2)-Co(1)-Cl(1)/Br(1) |           | 98.74(12)  | 98.04(13)  |
| N(1)-Co(1)-Cl(1)/Br(1) |           | 179.11(14) | 179.01(11) |
| Co(1)-Cl(1)-Co(1')     |           | 179.66(12) |            |
| Co(1)-Br(1)-Co(1')     |           |            | 179.06(5)  |

**Table S3.** Force Constants  $k$  in Dines  $\text{cm}^{-1}$  for **L1** and complexes **1-5**.

|            | $\kappa_{\text{O-H st}}$<br>$\times 10^5$ | $\kappa_{\text{N-H st}}$<br>$\times 10^5$ | $\kappa_{\text{C-H st}}$<br>$\times 10^5$ | $\kappa_{\text{C=O st}}$ | $\kappa_{\text{C=N st}}$<br>$\times 10^6$ | $\kappa_{\text{N=N st}}$<br>$\times 10^6$ | $\kappa_{\text{C=C st}}$<br>$\times 10^5$ | $\kappa_{\text{Cl-O st}}$<br>$\times 10^5$ | $\kappa_{\text{C-H } \delta}$<br>$\times 10^4$ | $\kappa_{\text{C-H } \delta \text{ ar}}$<br>$\times 10^4$ |
|------------|-------------------------------------------|-------------------------------------------|-------------------------------------------|--------------------------|-------------------------------------------|-------------------------------------------|-------------------------------------------|--------------------------------------------|------------------------------------------------|-----------------------------------------------------------|
| <b>L1</b>  |                                           | 5.9                                       | 4.3                                       |                          |                                           |                                           | 7.4                                       |                                            | 3.0/2.6/2.3                                    | 1.9                                                       |
| <b>1</b>   |                                           | 5.8                                       | 4.5                                       | 9.9x10 <sup>5</sup>      |                                           |                                           | 7.4                                       | 7.4                                        | 3.4/3.1/2.7                                    | 2.1                                                       |
| <b>2</b>   |                                           | 5.8                                       | 4.5                                       |                          | 2.0                                       |                                           | 7.5                                       | 7.2                                        | 3.4/3.1/2.6                                    | 2.1                                                       |
| <b>3</b>   |                                           | 5.7                                       | 4.5                                       |                          |                                           | 2.0/1.7                                   | 7.3                                       | 7.3                                        | 3.4/3.1/2.7                                    | 2.2                                                       |
| <b>4/5</b> |                                           | 5.9                                       | 4.7                                       |                          |                                           |                                           | 7.7                                       | 7.2                                        | 3.6/3.2/2.7                                    | 2.1                                                       |

**Table S4.** Wavelengths ( $\lambda$ ) and molar absorptivities ( $\epsilon$ ) for the electronic transitions in **1-5**.

|          | $\lambda$ (nm)<br>$\epsilon$ (Lmol <sup>-1</sup> cm <sup>-1</sup> ) |
|----------|---------------------------------------------------------------------|---------------------------------------------------------------------|---------------------------------------------------------------------|---------------------------------------------------------------------|---------------------------------------------------------------------|
| <b>1</b> | 460.0                                                               | 476.5                                                               | 602                                                                 |                                                                     | 705.0                                                               |
|          | 259.4                                                               | 267.47                                                              | 256.4                                                               | -                                                                   | 95.6                                                                |
| <b>2</b> | 466                                                                 | 466.0                                                               | 601.5                                                               | 656                                                                 | 658                                                                 |
|          | 231.9                                                               | 224.4                                                               | 234.8                                                               | 173.5                                                               | 82.3                                                                |
| <b>3</b> | 460.0                                                               | 486.0                                                               | 599.6                                                               |                                                                     | 708.0                                                               |
|          | 187.42                                                              | 181.4                                                               | 290.2                                                               | -                                                                   | 80.6                                                                |
| <b>4</b> |                                                                     | 509.0                                                               | 609.0                                                               | 683.0                                                               | 796.0                                                               |
|          | -                                                                   | 112.1                                                               | 161.7                                                               | 54.1                                                                | 26.7                                                                |
| <b>5</b> |                                                                     | 479.5                                                               | 606.0                                                               | 685.0                                                               | 844.0                                                               |
|          | -                                                                   | 132.6                                                               | 173.4                                                               | 126.5                                                               | 16.0                                                                |

**Table S5.** Overlap integrals calculations for complexes 1-5.

| Co2-OAc | $\alpha/\beta$ | $dx^2-y^2$ | $dxy$ | $dz^2$ |
|---------|----------------|------------|-------|--------|
|         | $dx^2-y^2$     | 0.023      | 0.006 | 0.080  |
|         | $dxy$          | 0.007      | 0.015 | 0.005  |
|         | $dz^2$         | 0.004      | 0.013 | 0.074  |

| Co2-OCN | $\alpha/\beta$ | $dx^2-y^2$ | $dxy$ | $dz^2$ |
|---------|----------------|------------|-------|--------|
|         | $dx^2-y^2$     | 0.001      | 0.001 | 0.001  |
|         | $dxy$          | 0.002      | 0.001 | 0.003  |
|         | $dz^2$         | 0.000      | 0.018 | 0.029  |

| Co2-N3 | $\alpha/\beta$ | $dx^2-y^2$ | $dxy$ | $dz^2$ |
|--------|----------------|------------|-------|--------|
|        | $dx^2-y^2$     | 0.004      | 0.005 | 0.004  |
|        | $dxy$          | 0.001      | 0.023 | 0.001  |
|        | $dz^2$         | 0.011      | 0.004 | 0.027  |

| Co2-Cl | $\alpha/\beta$ | $dx^2-y^2$ | $dxy$ | $dz^2$ |
|--------|----------------|------------|-------|--------|
|        | $dx^2-y^2$     | 0.003      | 0.064 | 0.034  |
|        | $dxy$          | 0.064      | 0.017 | 0.078  |
|        | $dz^2$         | 0.034      | 0.078 | 0.157  |

| Co2-Br | $\alpha/\beta$ | $dx^2-y^2$ | $dxy$ | $dz^2$ |
|--------|----------------|------------|-------|--------|
|        | $dx^2-y^2$     | 0.036      | 0     | 0.001  |
|        | $dxy$          | 0          | 0.034 | 0.014  |
|        | $dz^2$         | 0.001      | 0.001 | 0.299  |

**Table S6.** Contribution to *D* from different spin states for complexes **1**, **2** and **3**.

D = -16.370916 cm-1  
E/D = 0.218828

Individual contributions to D-tensor:

| Block | Mult | Root | D       | E      |
|-------|------|------|---------|--------|
| 0     | 4    | 0    | 0.000   | 0.000  |
| 0     | 4    | 1    | -35.816 | 0.076  |
| 0     | 4    | 2    | 3.290   | -2.953 |
| 0     | 4    | 3    | 7.218   | -7.169 |
| 0     | 4    | 4    | 7.189   | 7.363  |
| 0     | 4    | 5    | 0.595   | -0.621 |
| 0     | 4    | 6    | 0.369   | 0.372  |
| 0     | 4    | 7    | 0.000   | -0.000 |
| 0     | 4    | 8    | 0.069   | 0.071  |
| 0     | 4    | 9    | 0.059   | -0.063 |
| 1     | 2    | 0    | -0.977  | -1.277 |
| 1     | 2    | 1    | -0.475  | 0.580  |
| 1     | 2    | 2    | 0.554   | -0.011 |
| 1     | 2    | 3    | -0.085  | 0.048  |
| 1     | 2    | 4    | 0.027   | -0.003 |
| 1     | 2    | 5    | 2.289   | -0.166 |
| 1     | 2    | 6    | 1.420   | -0.012 |
| 1     | 2    | 7    | -1.634  | 0.897  |
| 1     | 2    | 8    | 1.563   | -0.373 |
| 1     | 2    | 9    | -0.297  | -0.300 |
| 1     | 2    | 10   | -0.132  | 0.139  |
| 1     | 2    | 11   | -0.014  | 0.012  |
| 1     | 2    | 12   | 0.282   | -0.000 |
| 1     | 2    | 13   | -0.042  | 0.021  |
| 1     | 2    | 14   | -0.152  | 0.160  |
| 1     | 2    | 15   | -0.001  | -0.022 |
| 1     | 2    | 16   | -0.335  | 0.287  |
| 1     | 2    | 17   | -0.182  | -0.014 |
| 1     | 2    | 18   | -0.416  | -0.557 |
| 1     | 2    | 19   | -0.048  | 0.121  |
| 1     | 2    | 20   | -0.266  | 0.011  |
| 1     | 2    | 21   | -0.496  | -0.364 |
| 1     | 2    | 22   | -0.084  | 0.084  |
| 1     | 2    | 23   | 0.504   | 0.010  |
| 1     | 2    | 24   | -0.129  | 0.149  |
| 1     | 2    | 25   | -0.088  | -0.100 |
| 1     | 2    | 26   | 0.002   | -0.000 |
| 1     | 2    | 27   | 0.000   | 0.001  |
| 1     | 2    | 28   | -0.002  | 0.002  |
| 1     | 2    | 29   | -0.184  | 0.164  |
| 1     | 2    | 30   | -0.138  | -0.141 |
| 1     | 2    | 31   | 0.172   | -0.000 |
| 1     | 2    | 32   | -0.007  | 0.005  |
| 1     | 2    | 33   | -0.002  | 0.002  |
| 1     | 2    | 34   | 0.001   | -0.001 |
| 1     | 2    | 35   | 0.054   | -0.001 |
| 1     | 2    | 36   | 0.000   | 0.000  |
| 1     | 2    | 37   | -0.002  | -0.003 |
| 1     | 2    | 38   | -0.013  | 0.014  |
| 1     | 2    | 39   | -0.013  | -0.020 |

D = 3.598602 cm-1  
E/D = 0.309882

Individual contributions to D-tensor:

| Block | Mult | Root | D       | E      |
|-------|------|------|---------|--------|
| 0     | 4    | 0    | 0.000   | -0.000 |
| 0     | 4    | 1    | 12.125  | 9.689  |
| 0     | 4    | 2    | -1.140  | -0.001 |
| 0     | 4    | 3    | 10.274  | -7.870 |
| 0     | 4    | 4    | -17.147 | 0.003  |
| 0     | 4    | 5    | 0.400   | -0.253 |
| 0     | 4    | 6    | -0.647  | 0.001  |
| 0     | 4    | 7    | -0.000  | -0.000 |
| 0     | 4    | 8    | -0.128  | -0.000 |
| 0     | 4    | 9    | 0.061   | -0.035 |
| 1     | 2    | 0    | 1.619   | -0.000 |
| 1     | 2    | 1    | -0.571  | 0.157  |
| 1     | 2    | 2    | -0.134  | -0.056 |
| 1     | 2    | 3    | 0.002   | -0.000 |
| 1     | 2    | 4    | 0.000   | 0.000  |
| 1     | 2    | 5    | -0.103  | -0.102 |
| 1     | 2    | 6    | -3.053  | -3.045 |
| 1     | 2    | 7    | 3.511   | 0.007  |
| 1     | 2    | 8    | -2.751  | 1.879  |
| 1     | 2    | 9    | 0.223   | 0.000  |
| 1     | 2    | 10   | -0.082  | 0.033  |
| 1     | 2    | 11   | 0.010   | -0.000 |
| 1     | 2    | 12   | -0.090  | -0.076 |
| 1     | 2    | 13   | 0.016   | -0.000 |
| 1     | 2    | 14   | -0.264  | 0.143  |
| 1     | 2    | 15   | 0.429   | -0.001 |
| 1     | 2    | 16   | 0.311   | -0.000 |
| 1     | 2    | 17   | -0.229  | 0.129  |
| 1     | 2    | 18   | 0.694   | -0.001 |
| 1     | 2    | 19   | -0.194  | 0.025  |
| 1     | 2    | 20   | -0.014  | 0.016  |
| 1     | 2    | 21   | -0.058  | 0.069  |
| 1     | 2    | 22   | 0.412   | 0.002  |
| 1     | 2    | 23   | -0.411  | -0.106 |
| 1     | 2    | 24   | -0.315  | 0.141  |
| 1     | 2    | 25   | 0.577   | -0.004 |
| 1     | 2    | 26   | 0.021   | 0.001  |
| 1     | 2    | 27   | -0.014  | 0.011  |
| 1     | 2    | 28   | 0.085   | 0.000  |
| 1     | 2    | 29   | 0.033   | 0.052  |
| 1     | 2    | 30   | 0.051   | 0.040  |
| 1     | 2    | 31   | -0.094  | -0.035 |
| 1     | 2    | 32   | 0.005   | 0.000  |
| 1     | 2    | 33   | -0.001  | 0.001  |
| 1     | 2    | 34   | 0.000   | -0.000 |
| 1     | 2    | 35   | -0.040  | -0.017 |
| 1     | 2    | 36   | -0.001  | 0.000  |
| 1     | 2    | 37   | 0.003   | 0.000  |
| 1     | 2    | 38   | 0.039   | 0.000  |
| 1     | 2    | 39   | -0.017  | 0.001  |

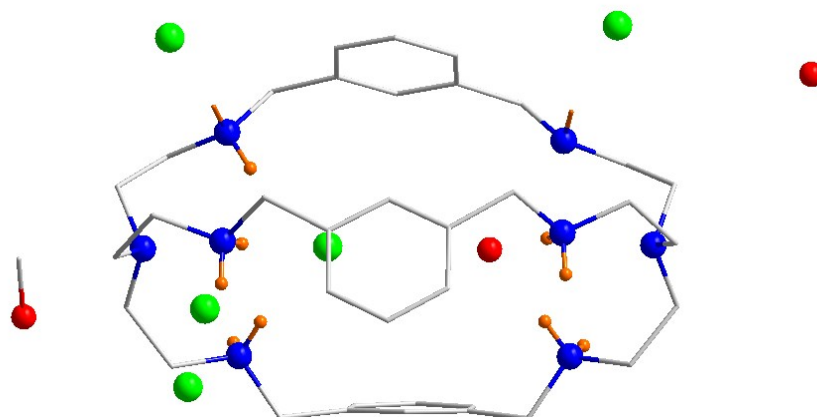

**Figure S1.** X-ray structure of the azacryptand ligand. Only the H atoms of the ammonium groups are shown for clarity. Colour code: Blue (N), red (O), grey (C), orange (H), Green (Cl).

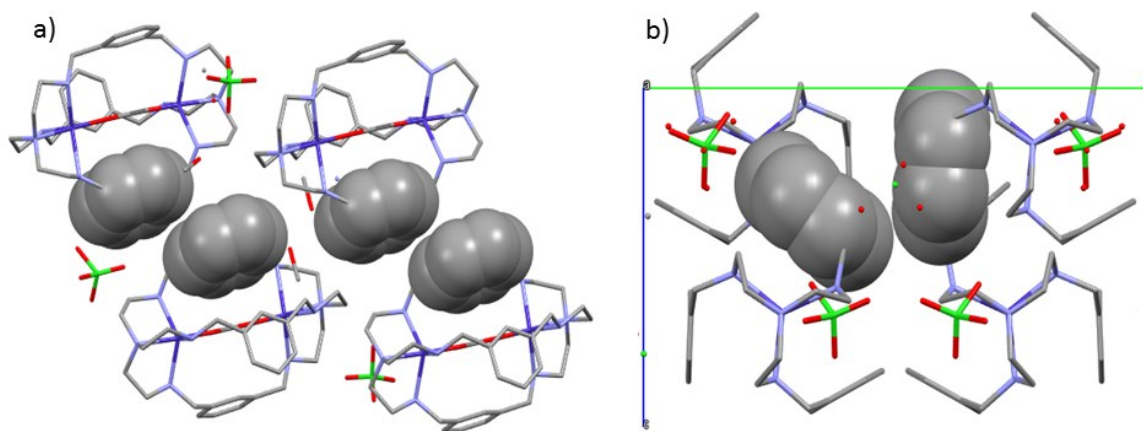

**Figure S2.**  $\pi$ - $\pi$  interactions for a) **2** and b) **4**. Colour code: Purple (Co), blue (N), red (O), grey (C), bright green (Cl).

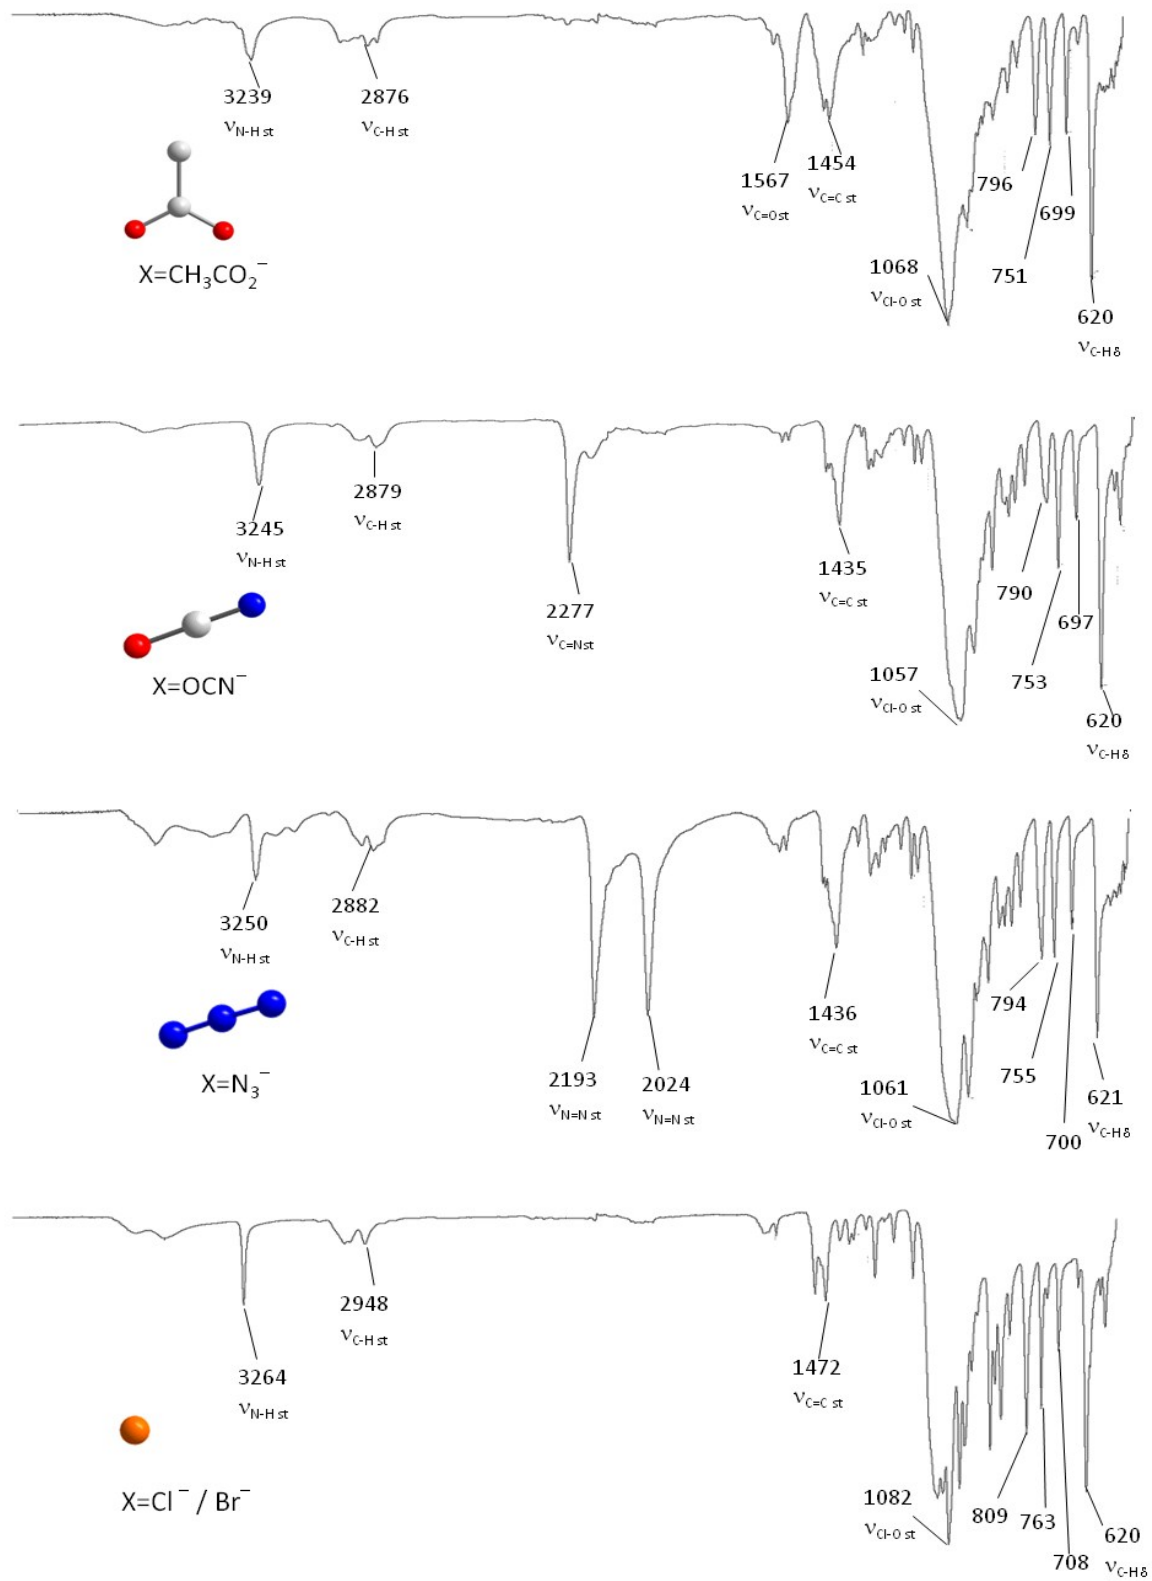

**Figure S3.** IR spectra of complexes **1-5** highlighting the main peaks in the 4000-400  $\text{cm}^{-1}$  zone.



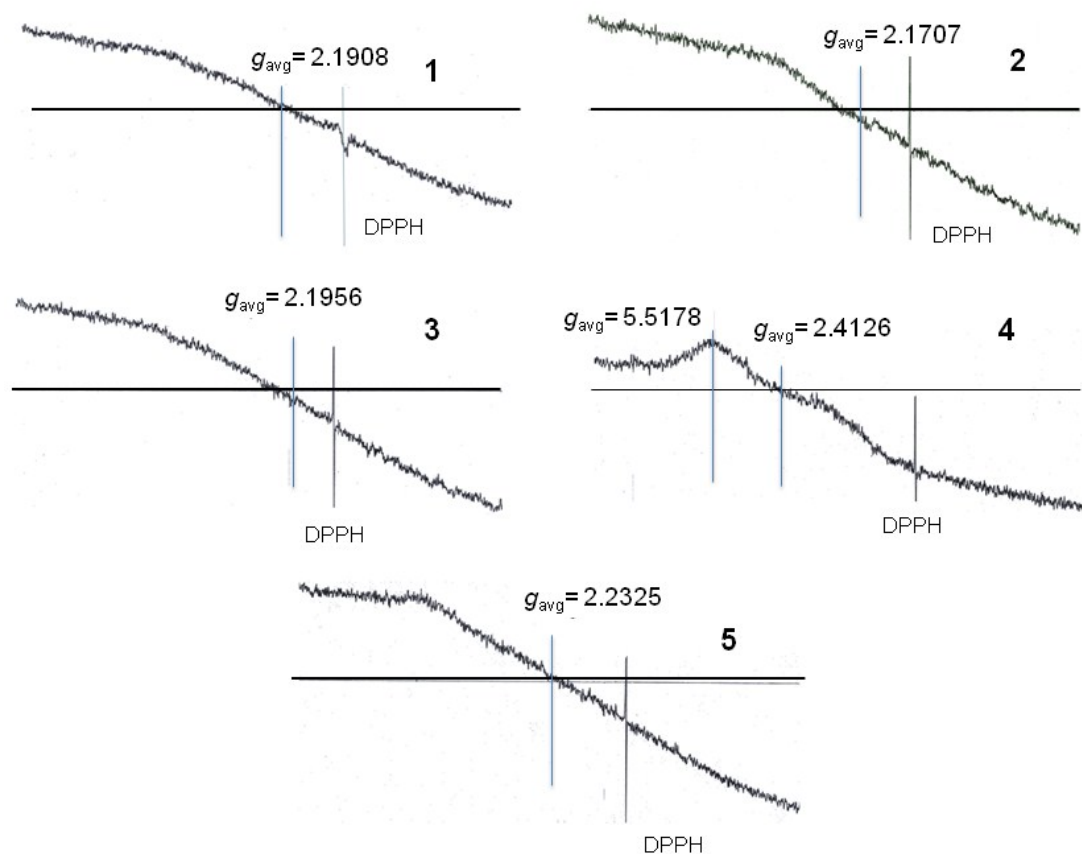

**Figure S4.** EPR spectra in  $\text{CH}_3\text{CN}$  at 77 K of complexes **1-5** showing broad signals with  $g_{\text{avg}}$  values. Slow sweep (min): 2; swp (mT):  $7.9 \times 100$ ; Mod. Wid. (mT):  $0.2 \times 1$ ; Amplitd:  $5 \times 1000$ ; Time Cnst. (ms): 0.03; Power (mW): 1.

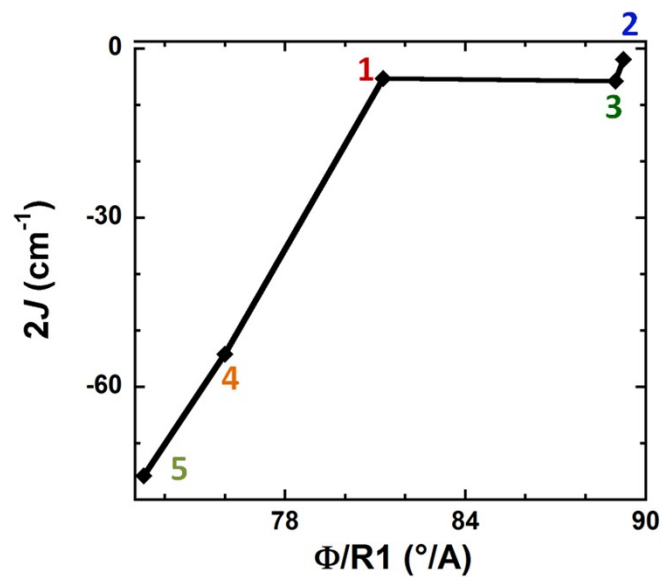

**Figure S5.** Plot of  $2J$  vs  $\Phi/R1$  for compounds **1-5**.

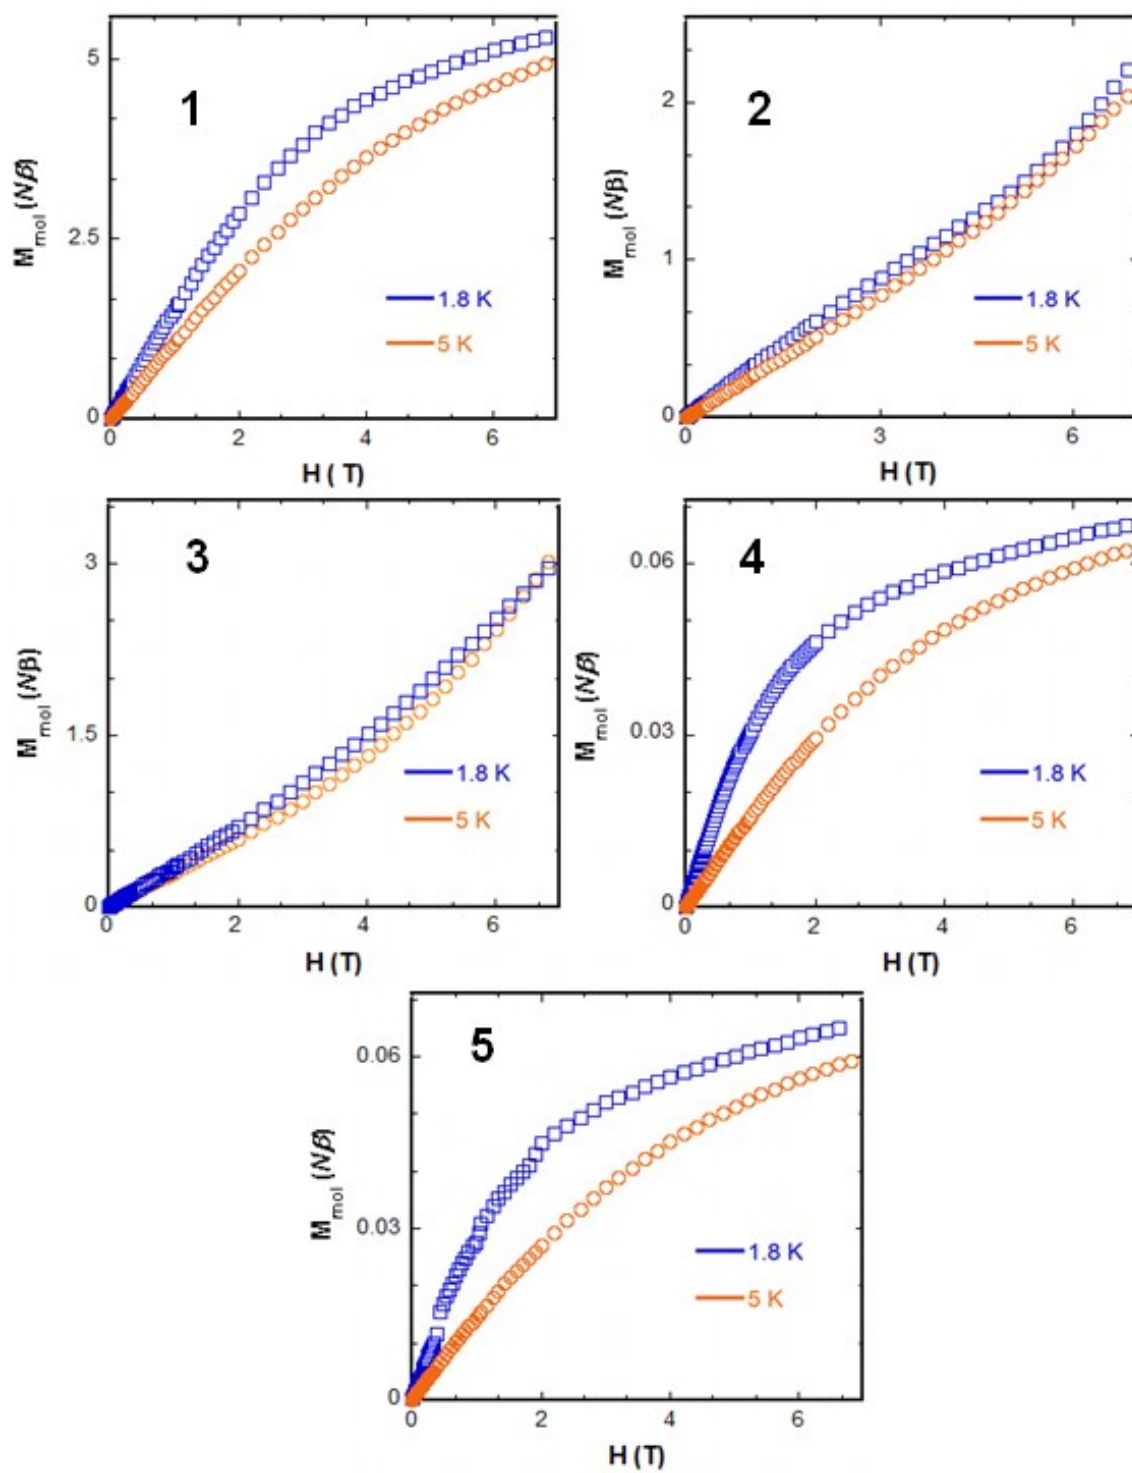

**Figure S6.** Plots of  $M_{\text{mol}}$  vs.  $H$  at 1.8 K (blue line) and 5 K (orange line) for compounds 1-5.

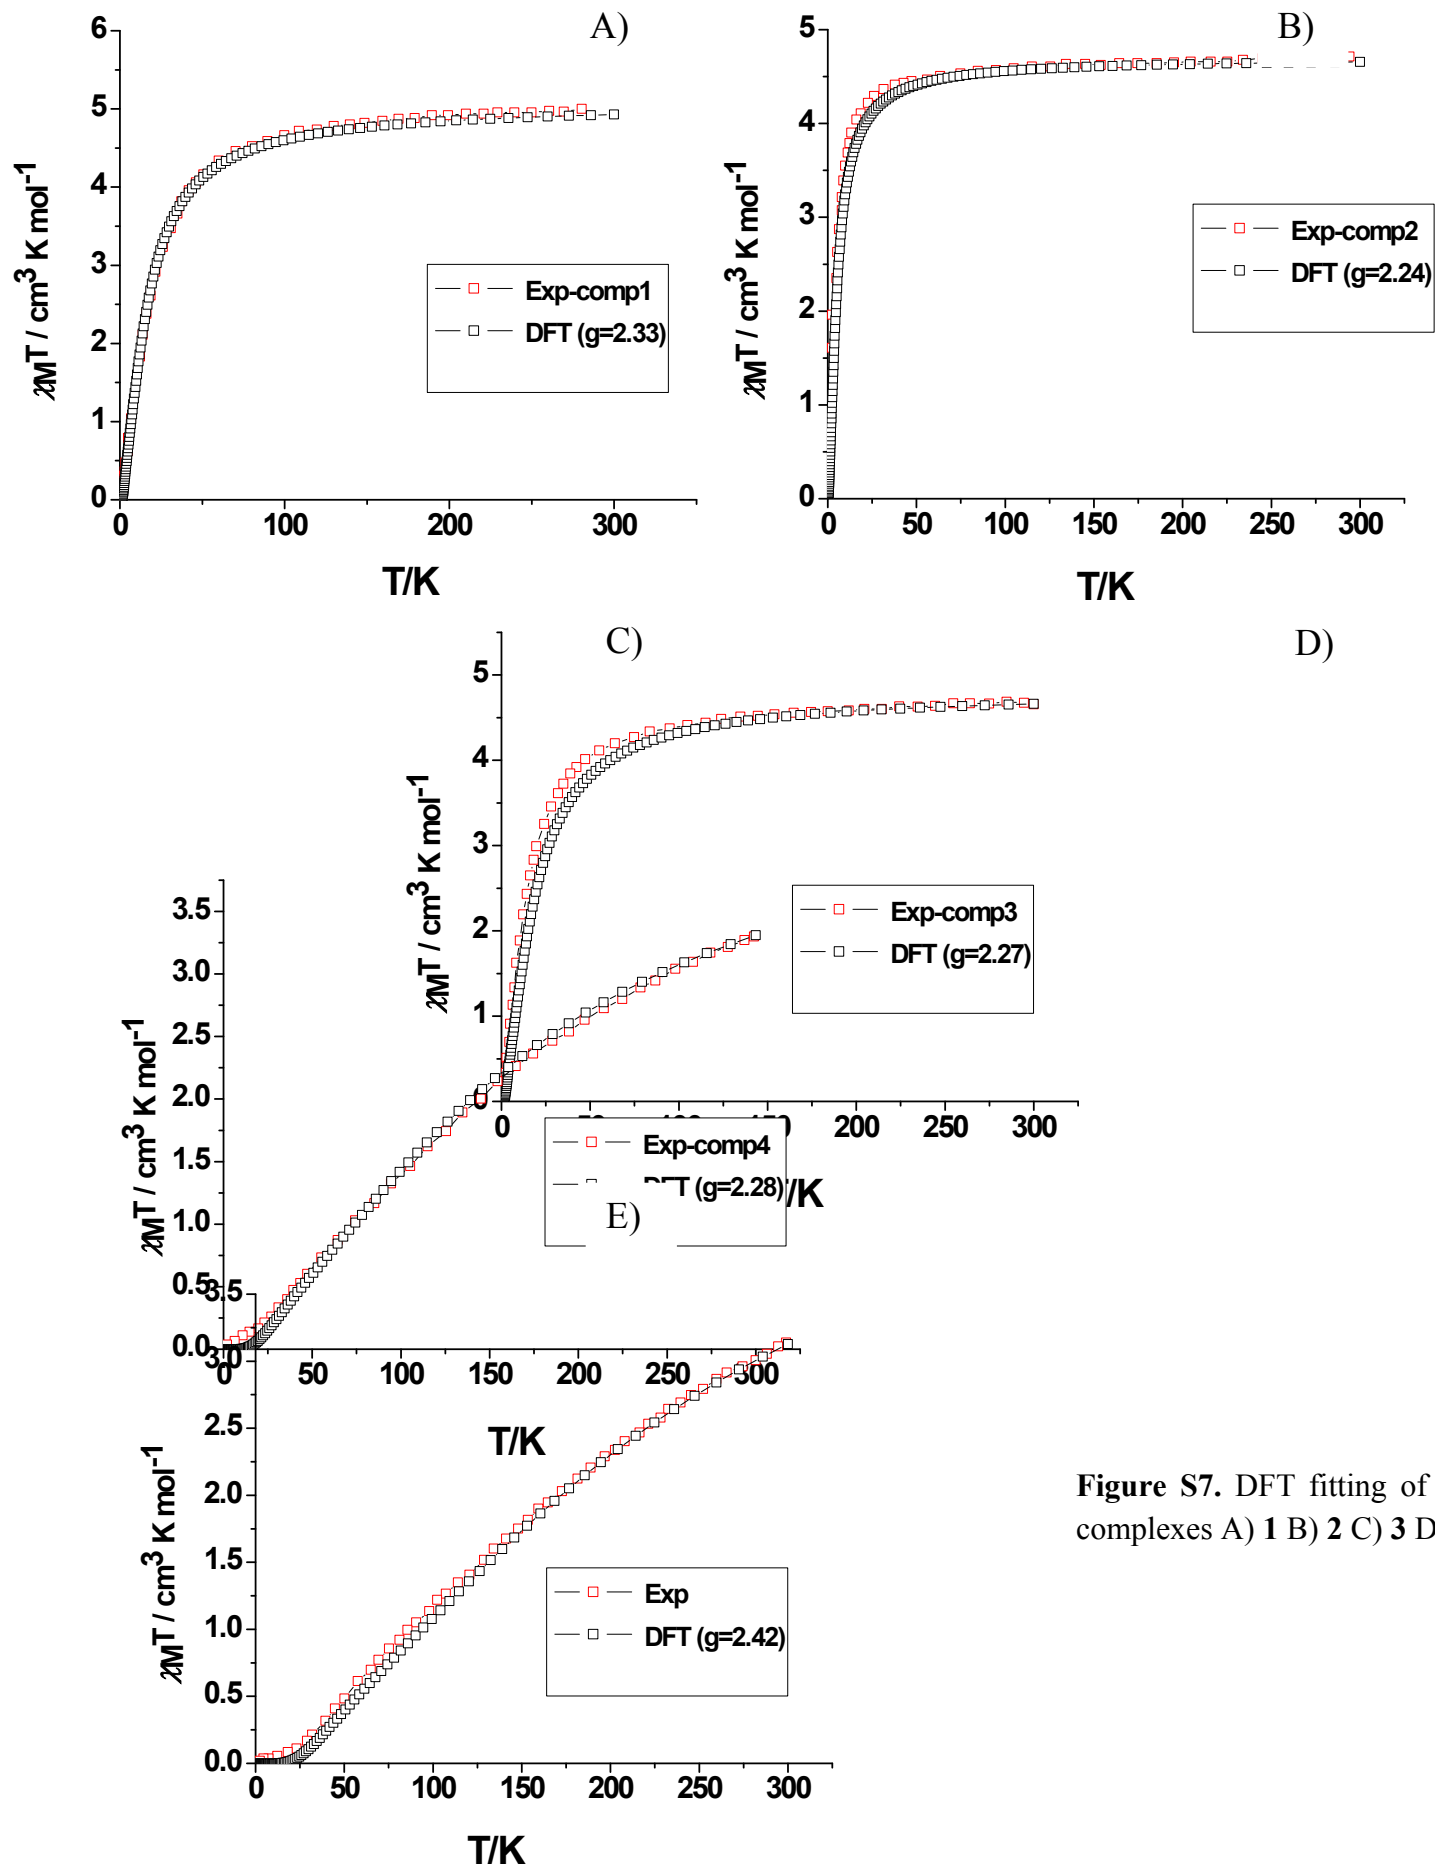

Figure S7. DFT fitting of  $\chi T$  vs. complexes A) 1 B) 2 C) 3 D) 4 and E) 5.

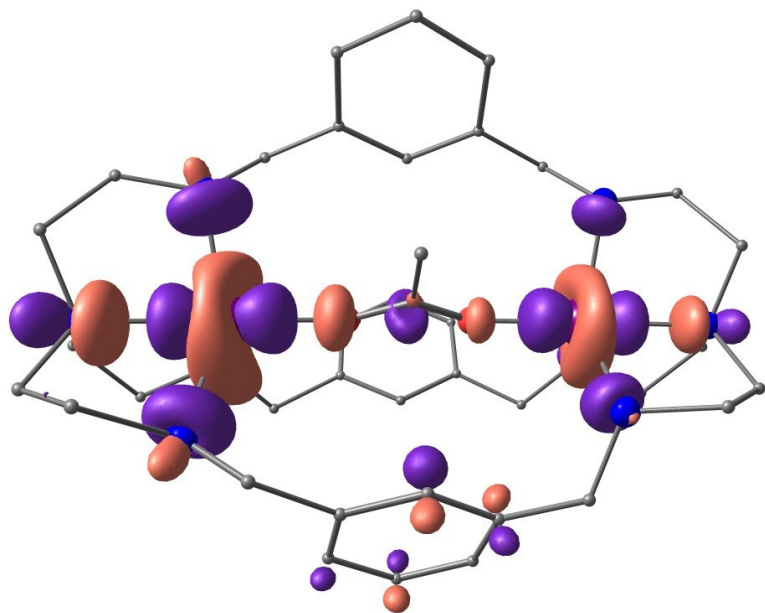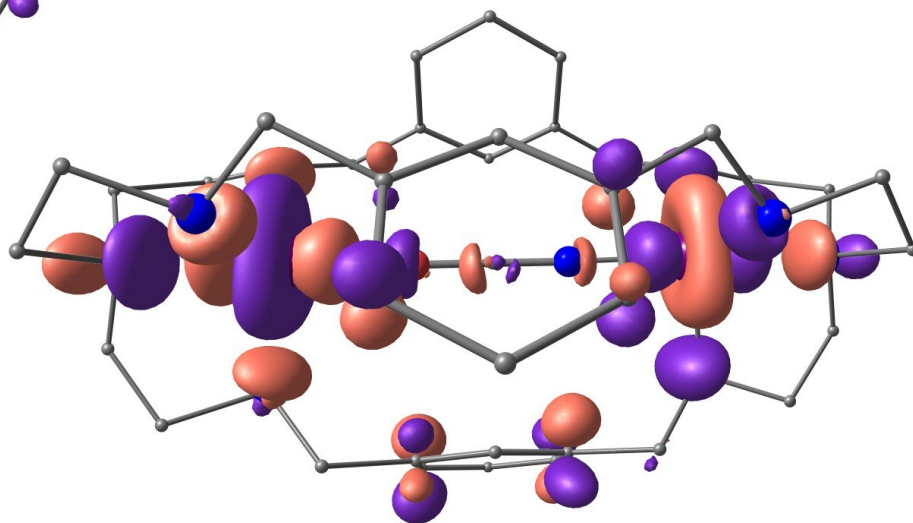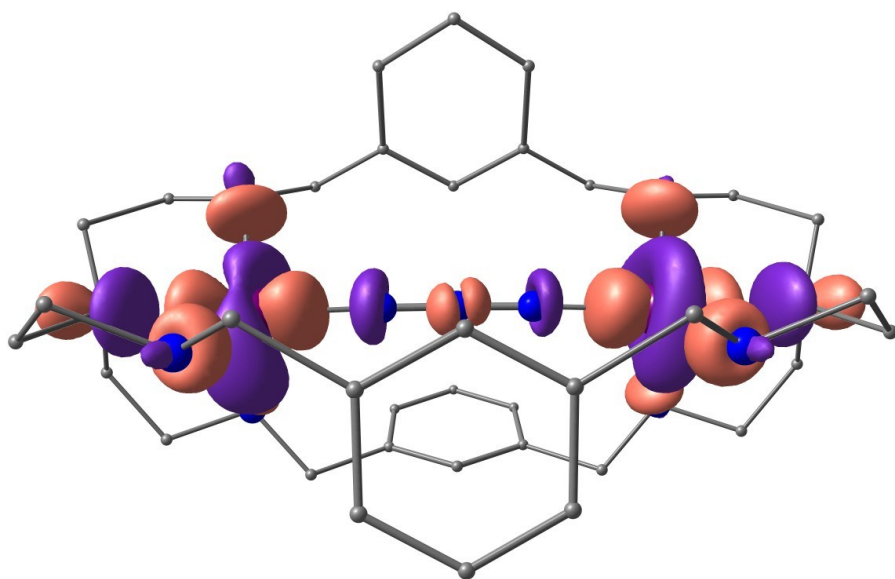

**Figure S8.** MOs of complexes **1-3** showing dominant  $d_z^2$ - $d_z^2$  interaction.

A)

B)

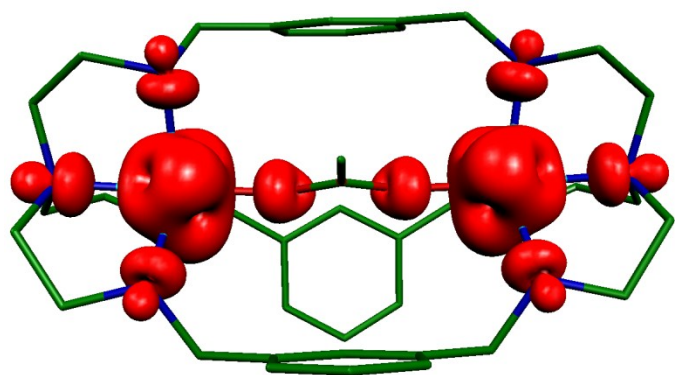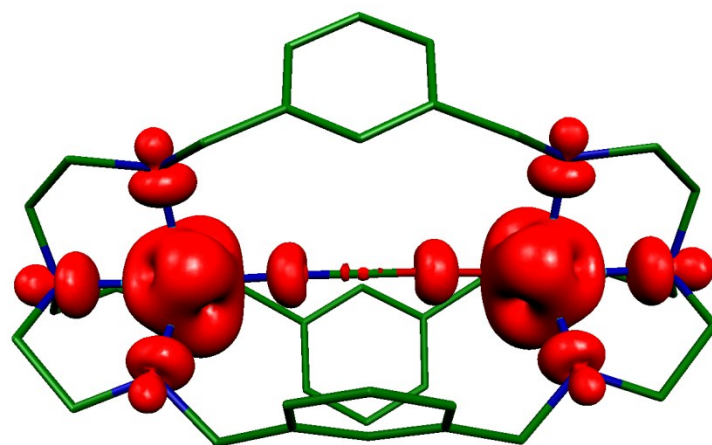

2.71 2.71

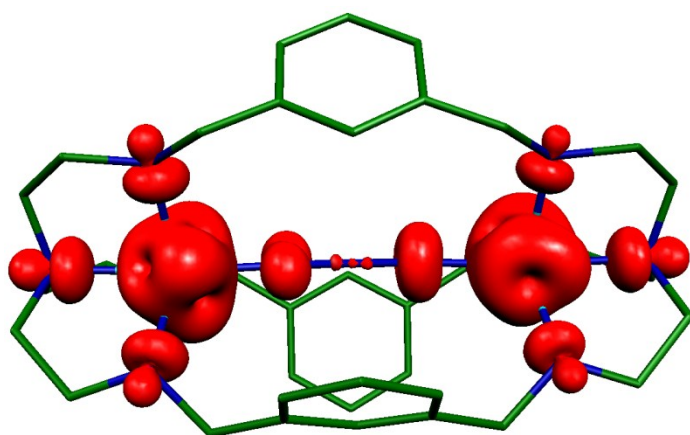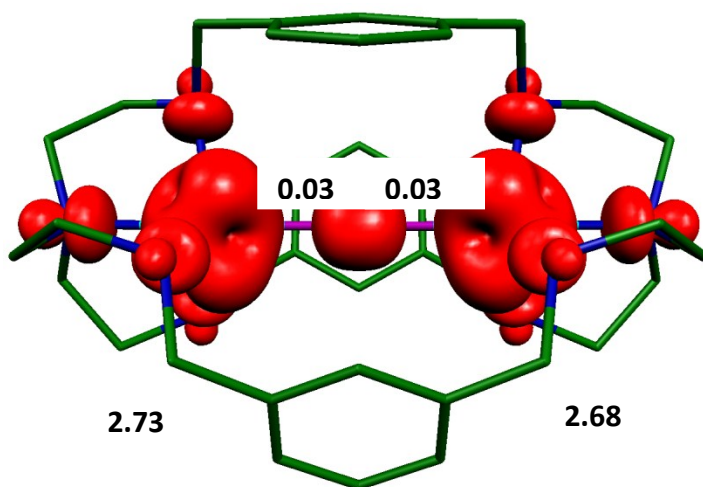

2.73

2.68

0.08

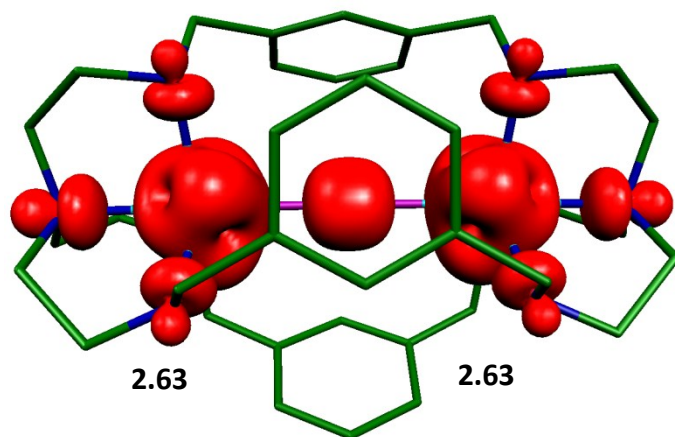

2.63

2.63

**Figure S9.** Spin density plots for complexes A) 1 B) 2 C) 3 D) 4 and E) 5.

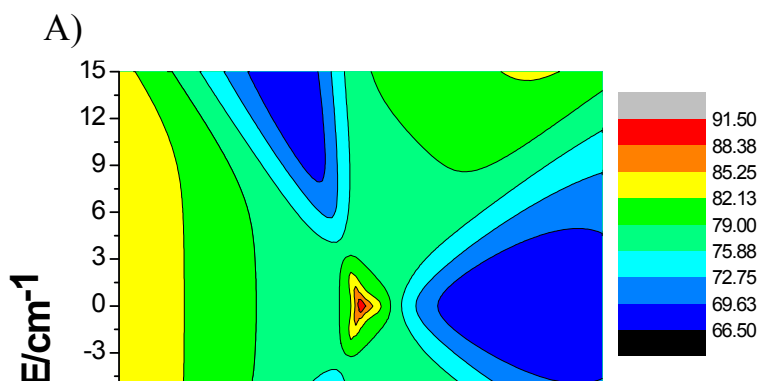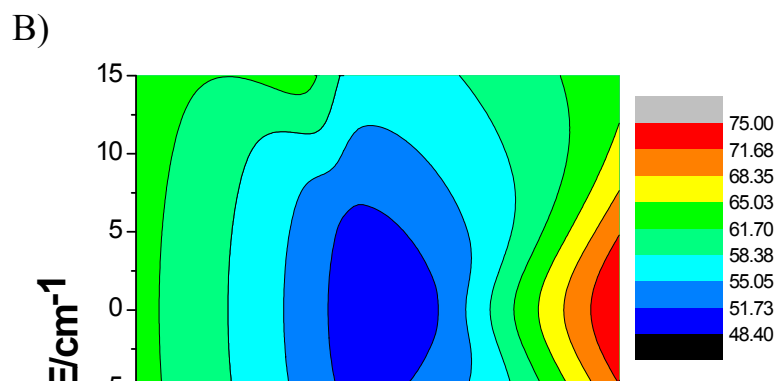

C)

D)

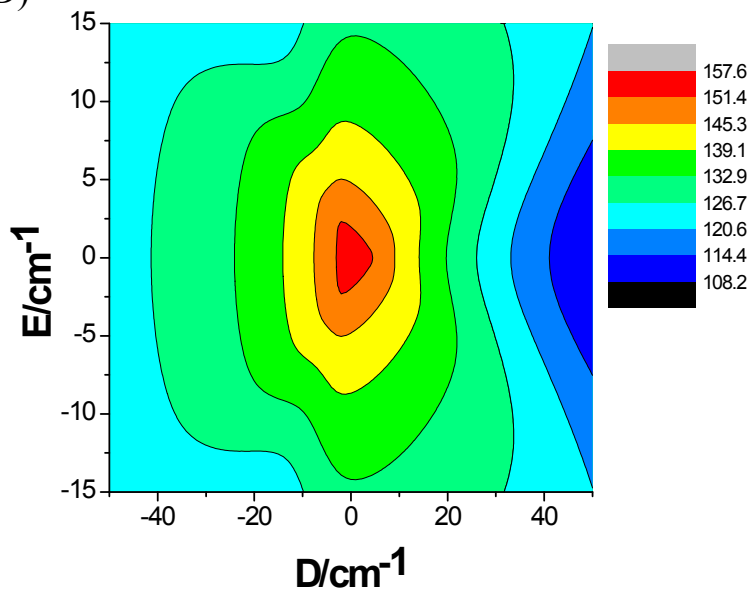

E)

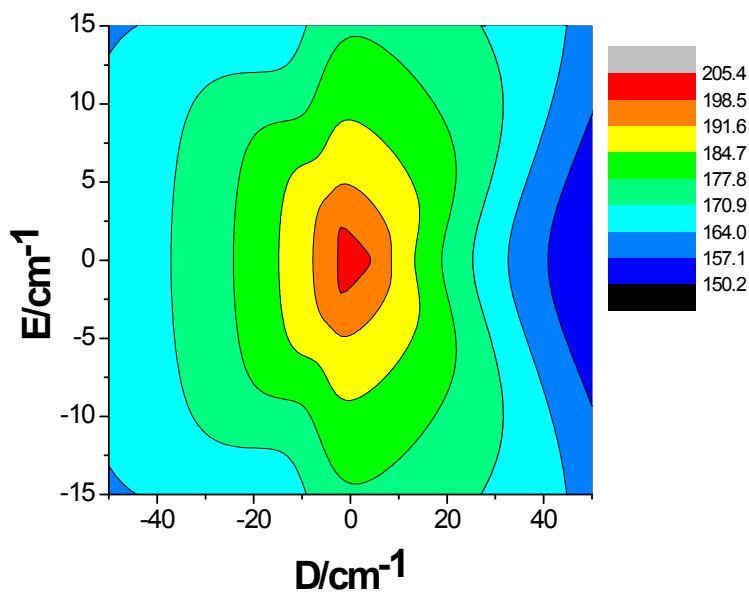

**Figure S10.** The magnetic data can be fitted using multiple parameters using PHI software which is represented in the 2-dimensional plot for models A) 1 B) 2 c) 3 d) 4 and e) 5. This clearly shows a range of parameters can yield a good fit to the magnetic data.
